# Supplementary material for: The Oncogenic EWS-FLI1 Protein Binds In Vivo GGAA Microsatellite Sequences with Potential Transcriptional Activation Function
Source: PLoS One. 2009 Mar 23;4(3):e4932. doi: 10.1371/journal.pone.0004932 (PMC2654724; doi:10.1371/journal.pone.0004932)
Supplement: Table S3 — Oligonucleotides used for microsatellite sequencing (0.03 MB XLS) [file pone.0004932.s003.xls]

## Sheet: SequenceOligo
Supporting Table S3: Oligonucleotides used for microsatellite sequencing
chromosome	start	end	forward primer	reverse primer
chr1	30503751	30504750	TGCCTCATAGGATCATAGCC	CTGCTCCTTACGCCTGTACC
chr1	57942751	57943500	AAACTCTATTCCTGTGTTGACCA	GGTGATGGGCTGCTGTTTAT
chr1	90306751	90307500	AAACTTTCCGTGCTTTCCTT	TGGAAGCGTAATGGTGAATC
chr1	102423251	102424000	TCTTGGTCCCTCATTGAACA	AAGGGGGCAGAAAAACATTC
chr1	114541251	114542000	ATTCCTCTCACCTCCCTTCC	CAACTAGCCAAGGCAGGTCT
chr1	161826001	161827000	TCCTGACTGACATCTTCTTGGA	TGCAATAGCAAATATCAGAATGTGT
chr1	175965251	175966000	AAGGGCAGAAACCAATGAAA	AGTTTTGGGGCAGGAAAGTC
chr1	182014501	182015500	TGGTGCTCCGCTTAGACTTT	AGGCTGAGGCAGGAGAATTT
chr1	183951501	183952500	TTGACTGTCCTTACCACTCTTGT	GTGCCAGAAGGCCAAAGATA
chr1	197396501	197397000	CCTATCCCTAGGCCCTGAAA	TTGCAAATTTACTCATACTTAATCACA
chr10	71470751	71471750	CCTTTGAGAACCTGCCAAAA	CAAAAGTATTAATTTGGGGAACTAA
chr11	39436501	39437250	GCTCAATGGAGGCACTCTTG	TGACTCTGGTCAGTTTTCTCTG
chr11	73856251	73857750	CCCACCTTGTTTTGACCCTA	AAACTGAGGTTGCAGGATGG
chr11	83135501	83136750	AGGAGAAGTGGTGGGAGGTT	CCAGCTACTGGAAAGGCTGA
chr11	131350501	131351750	AGCAGCTCTGGCATCAGAAG	AGGCAAAACAGGAGCAAGAA
chr12	12293501	12294250	CCTCAAGGACAGTGTTACAGC	CCAAGGCATGCCAGTAAGG
chr12	24351251	24352500	TCAAAATGTCATAATCCTTGAAAA	TGTTTTAGAGAAGCAGTGAACG
chr12	64746751	64747500	GCAGTGTGCTCAACTCTGGA	GCCTGCTCTGGGAAGTCTTA
chr12	85165251	85166500	CAGCACCATCTTTTCCTTCC	AAAAATCCACAGACAGGGTTG
chr13	93484001	93485000	ATTCGTGAAAGCACCAGGAA	CATAAAAACACTTTCACATATGCAG
chr14	44152001	44152750	GGGCAAGAAAGAAATGCAAA	TCTTGTAGAGACTTTCAGCATTATCA
chr14	96751251	96752000	GCCAAGGTCACCCAGTTAGA	GAAGACCATTGCCCCATCT
chr15	68387751	68389250	AAAGTCCTGGCTGGAAAACA	ACCTTTCCAGACCAAACCAA
chr15	75817251	75818750	CTGTCTGCCTCCTCATCACA	GACCTCAGTCTCGCTTCCAC
chr16	8566001	8567250	ACAGAGGTGGCAGGAATCAA	AGGCACCACTTTCACCTGAC
chr17	50640251	50641500	CGGTGTGCTGTGTAGGTGTT	TCTTGCCTTTAATTGTGGAAGAA
chr18	3732251	3733500	GCCCAGGAATTCTGACTTGT	TGTGCACATCTGTATAGCTTGG
chr18	17559251	17560000	TCCTCTGGAGGGGATTAATTT	CAGGGTGTTTTCACAGATGC
chr18	48207501	48208750	AGCTACCTAGTGCCAAATCCA	GACAAGTGCCAACATCTTTCC
chr18	53675001	53676000	TCAAAAGGGATCTCTAAGAAAGGA	AGCTTTTGAGCCAGGATGAG
chr18	64322251	64324000	GCAAAAATTCTTCCCCTAACG	CATTCTGGCCTGGAGCTAAA
chr2	25152251	25153500	TCTCCTAAGTTGGGAAAAAGATT	AGGCTTCTTTGGGCTTTGAT
chr2	78143501	78144750	AAGCAGGGGAGAATGAGGTT	CACCCACTCTTTGTCTTTGGA
chr2	145521251	145522250	TGGGTGGGTGAAAGTTTTGT	GCCCTAGCTCCCACTCACT
chr2	177229001	177230500	AAGGAATGAAACCCTGGAAGA	CATCCTTGGCCTCTGAAAAG
chr2	213475251	213476000	TCCATGAAACAACTACAAGCTCA	TGCTCCCCAATAACCTATGG
chr2	216110501	216111500	CCAGCTGTTGCTAATCTGCAT	TCGCCCAGTTCTCAGAATTTA
chr2	220910501	220911500	TTGAATCATTGACTGATGGAGAA	GCAATTGCAAATAAACCAAAGG
chr20	46941501	46942750	GCACAAAATCATCCCCAGTT	TAGCGAGACCCTCATCTCCA
chr21	22703501	22704500	TTTTACAGCAGCGTTTTTCC	TCGGCATTCCTGAATTGTCT
chr3	44978501	44979750	CACAGAATATTCAGAGTGGTTGC	CACTCCAGTAGGTGATGTTCC
chr3	58191501	58192500	TTTTGGCGTATTCCAAATTATTG	TCGAAATATCAGTTTGGTGAAGTC
chr3	87679751	87680750	AAACATTTTCCGGGTGACAA	GATGGGTTTTATTGGCCCTA
chr3	107918751	107920000	CCCTTCACACCTTACCTGCT	TGCACTGCAAATAACCTGAAG
chr3	124353251	124354250	AAGATCTACAACTCCTTCCTTCC	CCCTAGACACTGCACAGCAC
chr3	190701251	190702500	GAACCTTTTAACCCTTCCTTCC	GCCCTACTTGCATTCAATCAC
chr5	108974001	108974750	AAAGAGTGCCTATGATATGGTTCC	TGTCATACTGTACAGGTTTTGATTTG
chr6	15216001	15217250	AACGGGTGTGTTTTTATGTGAA	GGATGGCCAGATTTATGTGC
chr6	18842001	18843000	TTGATTTTTGACCAGATTTTTCA	ATTGCCCATGAAACCACCTT
chr6	24489751	24490500	TTGCGGCACAATTTACTCTC	ATAGCTTGCCTGCCTTCCTT
chr6	123586251	123587250	GCTGAAGCCCTCATTCTACAG	TCACATATTAAAAACACTAGTTGGGTA
chr6	131746001	131747500	CTGACCTGTGATGTGTTGGTTT	TTTCCCAATTCCCTTTCTCC
chr7	90088501	90089500	GTTCCTGAGGGCAGAGACAG	CTTCCGTTTCCCCATCTGTA
chr7	115895501	115896750	GCAATGCACAACACATTTTGA	CCAGTAAAACACAAAATCTCATTTAAC
chr8	27102501	27103250	CAGACACTTGTCTTCTCACTTGG	CAGTCCAGGTTCTGAGATGC
chr8	56604751	56605750	AACCTGATGCCATGTCTCTTG	GACTTATATGATTGTTCAAGCTAGTGG
chr8	70601001	70602250	TACTTGGGAGGCTGAGATGG	ATACCAGCCAAAGCCAAACA
chr8	119177751	119178750	GCCTGTAATCCCAGCACTTT	GCTGGTTCACCCAGAGTTTC
chr9	4646001	4647000	CAGCTACTTGTGGGGCTGAG	TCGATGATATTTTTAGCATGTGG
chr9	117215751	117216500	CTGAGACAAATGTGAGTGACCA	CCAGGCTACAGGGTACACCA
